# Supplementary material for: Combined Toxic Effects of BPA and Its Two Analogues BPAP and BPC in a 3D HepG2 Cell Model
Source: MDPI journal article supplement (doi:10.3390/molecules28073085), 2023-03-30

## SUPPORTING INFORMATION

### SI-1 Results

**Table S1.** Measurements of average surface area of spheroids ( $\mu\text{m}^2$ ) at time 0 (3-days old) and after 24-h exposure to BPs and their combinations. The measurement of a surface area were taken before treatment (time 0) and after 24 h of exposure at 4x magnification using Cytation 5 (BioTek, Winooski, VT, USA). 15 % DMSO served as a positive control (PC). The experiment was conducted at least in five replicates and in three biologically independent experiments.

|          |                                 | Average surface area at time 0<br>(before treatment) |       | Average surface area after 24 h of<br>treatment |       |
|----------|---------------------------------|------------------------------------------------------|-------|-------------------------------------------------|-------|
| BPs      | Concentration ( $\mu\text{M}$ ) | Average spheroid<br>area ( $\mu\text{m}^2$ )         | SD    | Average spheroid<br>area ( $\mu\text{m}^2$ )    | SD    |
| SC       |                                 | 230760                                               | 29788 | 281083                                          | 31484 |
| BPA      | 10                              | 226500                                               | 13457 | 286611                                          | 33389 |
|          | 20                              | 236167                                               | 12655 | 288500                                          | 30721 |
|          | 40                              | 226337                                               | 13923 | 281222                                          | 36975 |
|          | 80                              | 221485                                               | 12079 | 272944                                          | 20490 |
| BPAP     | 10                              | 228862                                               | 15091 | 280667                                          | 9134  |
|          | 20                              | 223089                                               | 8074  | 264778                                          | 28065 |
|          | 40                              | 213167                                               | 11856 | 245056                                          | 23277 |
|          | 80                              | 232694                                               | 35623 | 271444                                          | 32633 |
| BPC      | 10                              | 225667                                               | 29309 | 283522                                          | 24154 |
|          | 20                              | 230333                                               | 19043 | 261972                                          | 29212 |
|          | 40                              | 237825                                               | 24022 | 265667                                          | 25007 |
|          | 80                              | 222537                                               | 8406  | 275167                                          | 15940 |
| BPA+BPAP | 10+10                           | 233824                                               | 19325 | 287222                                          | 33593 |
|          | 20+20                           | 254053                                               | 58763 | 293889                                          | 37801 |
|          | 40+40                           | 228347                                               | 7298  | 283722                                          | 29310 |
| BPA+BPC  | 10+10                           | 218933                                               | 32916 | 294667                                          | 31687 |
|          | 20+20                           | 224333                                               | 8565  | 292667                                          | 14449 |
|          | 40+40                           | 236500                                               | 29620 | 282944                                          | 23083 |
| PC       | 15 % DMSO                       | 229667                                               | 26157 | 305550                                          | 42956 |

**Table S2.** Measurements of average surface area of spheroids ( $\mu\text{m}^2$ ) at time 0 (3-days old) and after 24 and 96 h exposure to BPs and their combinations to 10x lower concentrations. The measurement of a surface area were taken before treatment (time 0) and after 24 and 96 h of exposure at 4x magnification using Cytation 5 (BioTek, Winooski, VT, USA). 15 % DMSO served as a positive control (PC). The experiment was conducted at least in five replicates and in three biologically independent experiments.

|          |                                 | Average surface area at time 0 (before treatment) |       | Average surface area after 24 h of treatment |       | Average surface area after 96 h of treatment |       |
|----------|---------------------------------|---------------------------------------------------|-------|----------------------------------------------|-------|----------------------------------------------|-------|
| BPs      | Concentration ( $\mu\text{M}$ ) | Average spheroid area ( $\mu\text{m}^2$ )         | SD    | Average spheroid area ( $\mu\text{m}^2$ )    | SD    | Average spheroid area ( $\mu\text{m}^2$ )    | SD    |
| SC       |                                 | 228000                                            | 26885 | 265667                                       | 3055  | 385472                                       | 16393 |
| BPA      | 1                               | 233667                                            | 8116  | 260004                                       | 12166 | 388416                                       | 28952 |
|          | 2                               | 238500                                            | 12744 | 276333                                       | 18016 | 382875                                       | 30228 |
|          | 4                               | 221409                                            | 19416 | 262666                                       | 12345 | 389500                                       | 34648 |
|          | 8                               | 225720                                            | 23301 | 272333                                       | 18709 | 391222                                       | 28359 |
| BPAP     | 1                               | 197803                                            | 9605  | 258667                                       | 20848 | 385833                                       | 28191 |
|          | 2                               | 199322                                            | 14846 | 235000                                       | 17531 | 347722                                       | 24679 |
|          | 4                               | 225750                                            | 28324 | 253667                                       | 17021 | 355167                                       | 22503 |
|          | 8                               | 223568                                            | 16784 | 276667                                       | 16932 | 366500                                       | 2121  |
| BPC      | 1                               | 246533                                            | 14417 | 304000                                       | 14933 | 369750                                       | 35229 |
|          | 2                               | 266537                                            | 27744 | 286333                                       | 6658  | 334396                                       | 33005 |
|          | 4                               | 250667                                            | 33416 | 293667                                       | 12014 | 337625                                       | 30467 |
|          | 8                               | 281500                                            | 25727 | 309333                                       | 577   | 394667                                       | 11504 |
| BPA+BPAP | 1+1                             | 207600                                            | 6831  | 257667                                       | 13051 | 377875                                       | 33057 |
|          | 2+2                             | 225400                                            | 7236  | 248667                                       | 15503 | 375500                                       | 58690 |
|          | 4+4                             | 237600                                            | 39841 | 257000                                       | 14442 | 362334                                       | 32999 |
| BPA+BPC  | 1+1                             | 226467                                            | 20696 | 291333                                       | 10017 | 386083                                       | 15464 |
|          | 2+2                             | 227893                                            | 10210 | 299667                                       | 17559 | 390778                                       | 22364 |
|          | 4+4                             | 241671                                            | 13626 | 302667                                       | 25580 | 374563                                       | 22776 |
| PC       | 15 % DMSO                       | 235550                                            | 12093 | 301333                                       | 20333 | 215600                                       | 53174 |

**Figure S1.** Representative light microscopy micrographs showing changes in average surface area, compactness, and shape of 72-h-old spheroids exposed to BPs for 24-h. The micrographs were taken before treatment (time 0) and after 24 h of exposure at 4x magnification using Cytation 5 (BioTek, Winooski, VT, USA). 15 % DMSO served as a positive control (PC). The experiment was conducted at least in five replicates and in three biologically independent experiments.

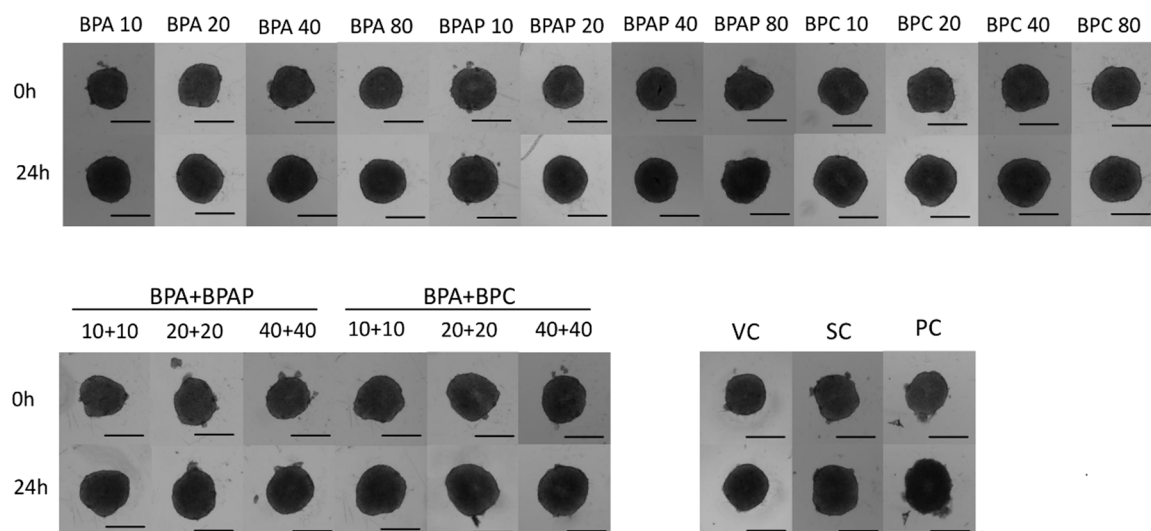

**Figure S2.** Representative light microscopy micrographs showing changes in average surface area, compactness, and shape of 72-h-old spheroids exposed to BPs for 24-h and 96h to 10x lower concentrations. The micrographs were taken before treatment (time 0) and after 24 and 96 h of exposure at 4x magnification using Cytation 5 (BioTek, Winooski, VT, USA). 15 % DMSO served as a positive control (PC). The experiment was conducted at least in five replicates and in three biologically independent experiments.

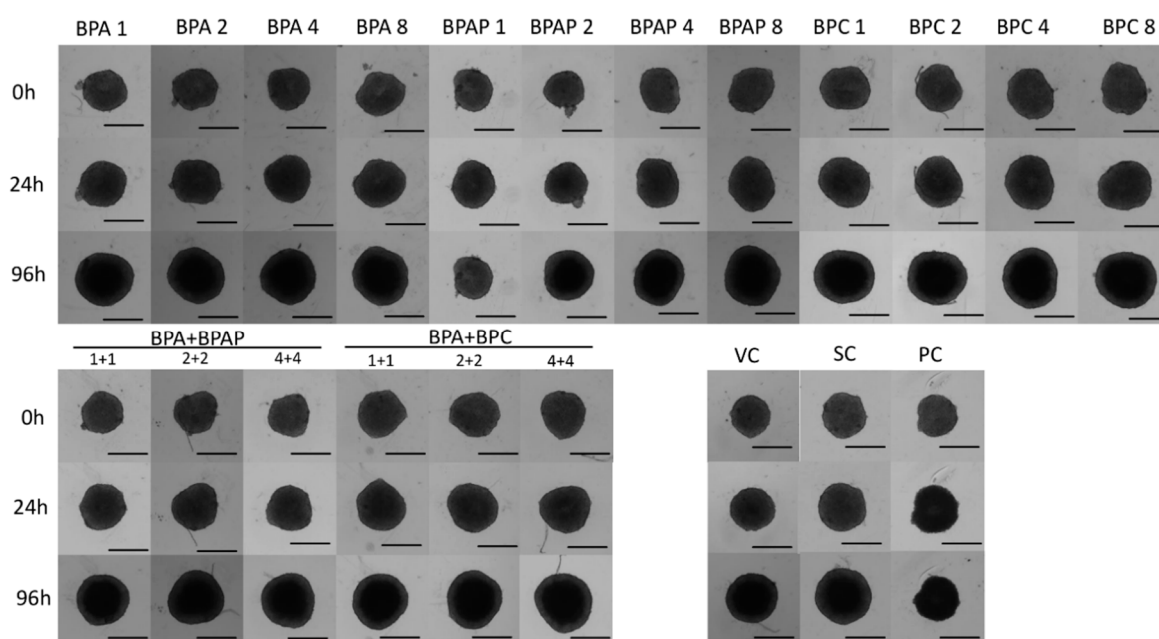

**Table S3.** Determination of protein concentration (mg/ml) in spheroids exposed to BPs and their binary mixtures for 24h and 96h by Bradford assay. PC - positive control (Luperox® TBH70X (0.7  $\mu$ M). Measurements were done in three independent biological experiments.

| 24 h            |                                          | 96 h            |                                          |
|-----------------|------------------------------------------|-----------------|------------------------------------------|
| Con.            | Protein concentration per sample [mg/ml] | Con.            | Protein concentration per sample [mg/ml] |
| $\mu$ M         | Ave. $\pm$ SD                            | $\mu$ M         | Ave. $\pm$ SD                            |
| 0               | 0,3633 $\pm$ 0,0062                      | 0               | 0,4335 $\pm$ 0,0437                      |
| <b>BPA</b>      |                                          | <b>BPA</b>      |                                          |
| 10              | 0,3215 $\pm$ 0,0563                      | 1               | 0,4481 $\pm$ 0,0407                      |
| 20              | 0,3218 $\pm$ 0,0581                      | 2               | 0,4261 $\pm$ 0,0493                      |
| 40              | 0,3475 $\pm$ 0,0268                      | 4               | 0,4442 $\pm$ 0,0532                      |
| <b>BPAP</b>     |                                          | <b>BPAP</b>     |                                          |
| 10              | 0,3115 $\pm$ 0,0223                      | 1               | 0,4447 $\pm$ 0,0608                      |
| 20              | 0,3120 $\pm$ 0,0249                      | 2               | 0,4223 $\pm$ 0,0499                      |
| 40              | 0,3015 $\pm$ 0,0269                      | 4               | 0,4150 $\pm$ 0,0361                      |
| <b>BPC</b>      |                                          | <b>BPC</b>      |                                          |
| 10              | 0,3276 $\pm$ 0,0460                      | 1               | 0,4372 $\pm$ 0,0568                      |
| 20              | 0,3468 $\pm$ 0,0223                      | 2               | 0,4484 $\pm$ 0,0636                      |
| 40              | 0,3104 $\pm$ 0,0400                      | 4               | 0,4182 $\pm$ 0,0332                      |
| <b>BPA+BPAP</b> |                                          | <b>BPA+BPAP</b> |                                          |
| 10+10           | 0,3349 $\pm$ 0,0211                      | 1+1             | 0,4301 $\pm$ 0,0477                      |
| 20+20           | 0,3287 $\pm$ 0,0266                      | 2+2             | 0,4207 $\pm$ 0,0224                      |
| <b>BPA+BPC</b>  |                                          | <b>BPA+BPC</b>  |                                          |
| 10+10           | 0,3226 $\pm$ 0,0351                      | 1+1             | 0,4339 $\pm$ 0,0362                      |
| 20+20           | 0,3455 $\pm$ 0,0285                      | 2+2             | 0,4551 $\pm$ 0,0060                      |
| <b>PC</b>       |                                          | <b>PC</b>       |                                          |
| 0,7             | 0,0632 $\pm$ 0,0220                      | 0,7             | 0,0514 $\pm$ 0,0329                      |

**Figure S3.** Standard curve for determination of protein content in samples, acquired by Bradford assay.

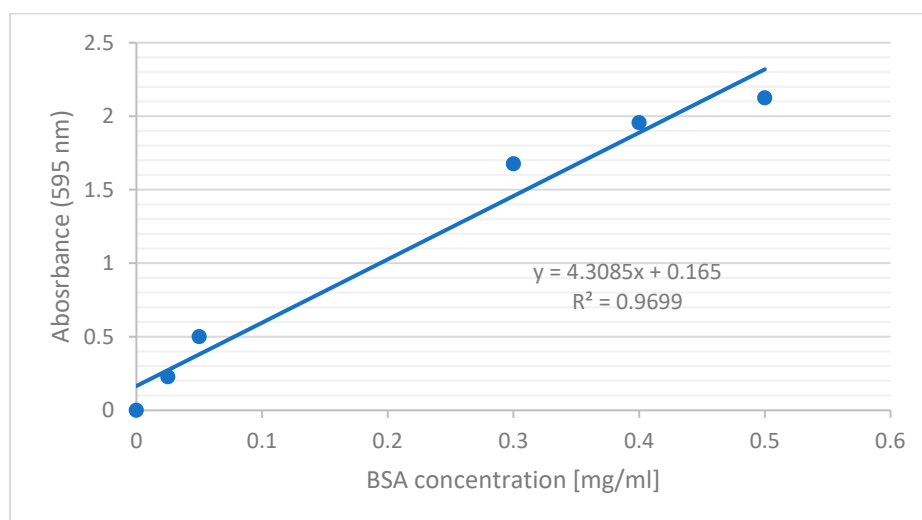

Supplement: s1 [file s1]
